# Supplementary material for: Influence of Sodium Bicarbonate on Wall Teichoic Acid Synthesis and β-Lactam Sensitization in NaHCO3-Responsive and Nonresponsive Methicillin-Resistant Staphylococcus aureus
Source: PubMed Central journal article supplement (PMC9769754; doi:10.1128/spectrum.03422-22), 2022-11-15
Supplement: spectrum.03422-22-s0001.pdf [file spectrum.03422-22-s0001.pdf]

## Supplemental Figures and Tables

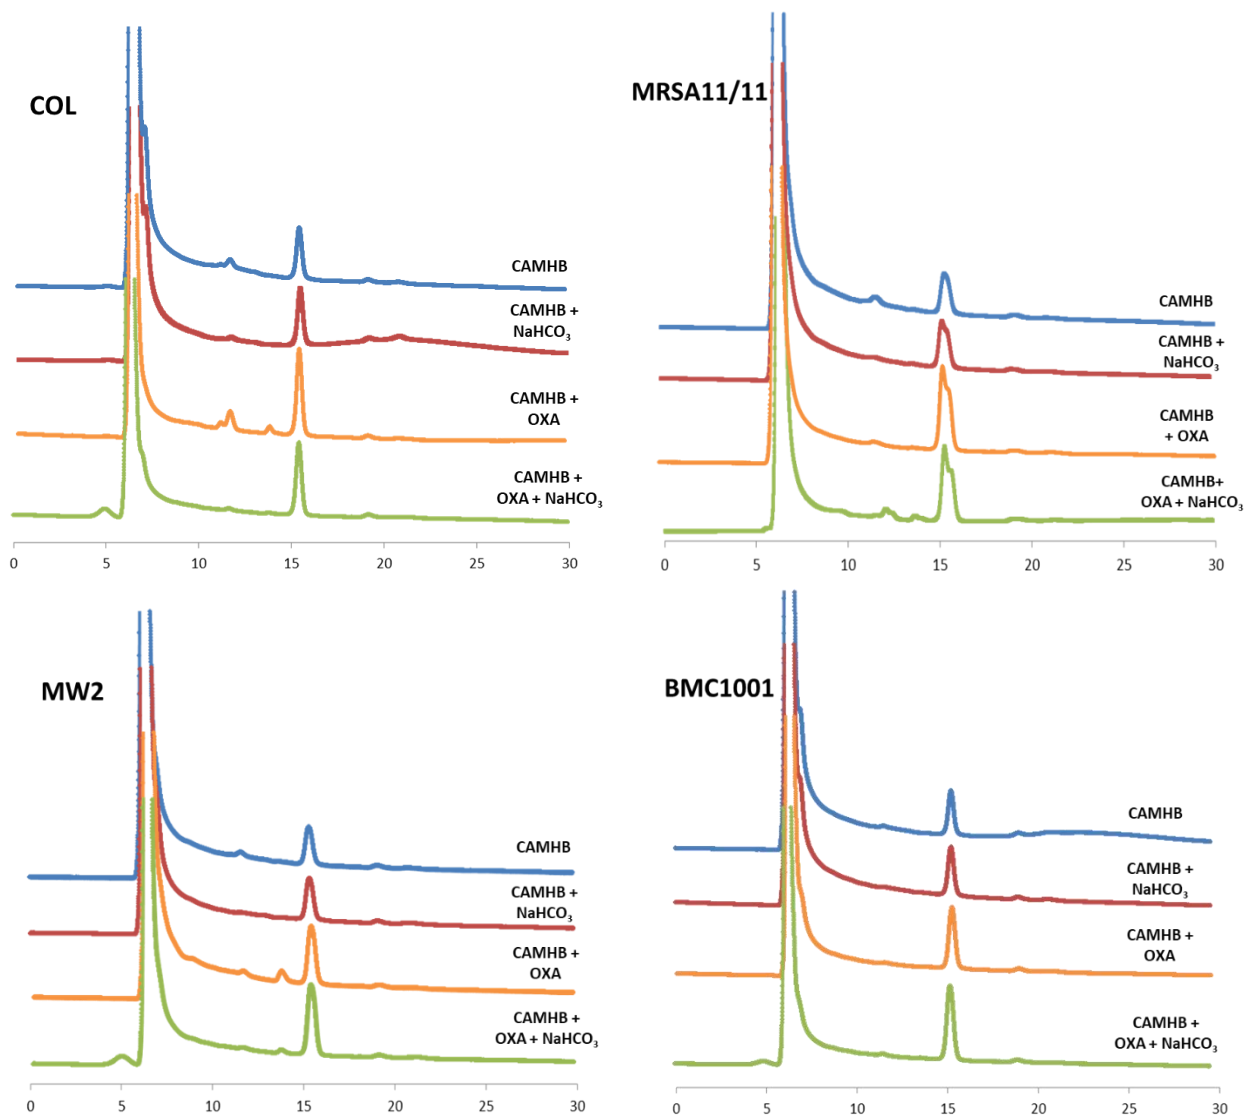

**Figure S1.** Determination of *O*-acetylation contents of *S. aureus* COL, BMC1001, MW2 and MRSA11/11 in CAMHB (blue); CAMHB + 44 mM NaHCO<sub>3</sub> (red); CAMHB + 2% NaCl+<sup>1/2</sup>MIC oxacillin (128 µg/ml – COL; 64 µg/ml – BMC1001; 8 µg/ml- MW2 and MRSA11/11) (orange); CAMHB + 2% NaCl+<sup>1/2</sup>MIC oxacillin + 44 mM NaHCO<sub>3</sub> (128 µg/ml – COL; 64 µg/ml – BMC1001; 0.25 µg/ml- MW2; 0.5 µg/ml -MRSA11/11) (green).

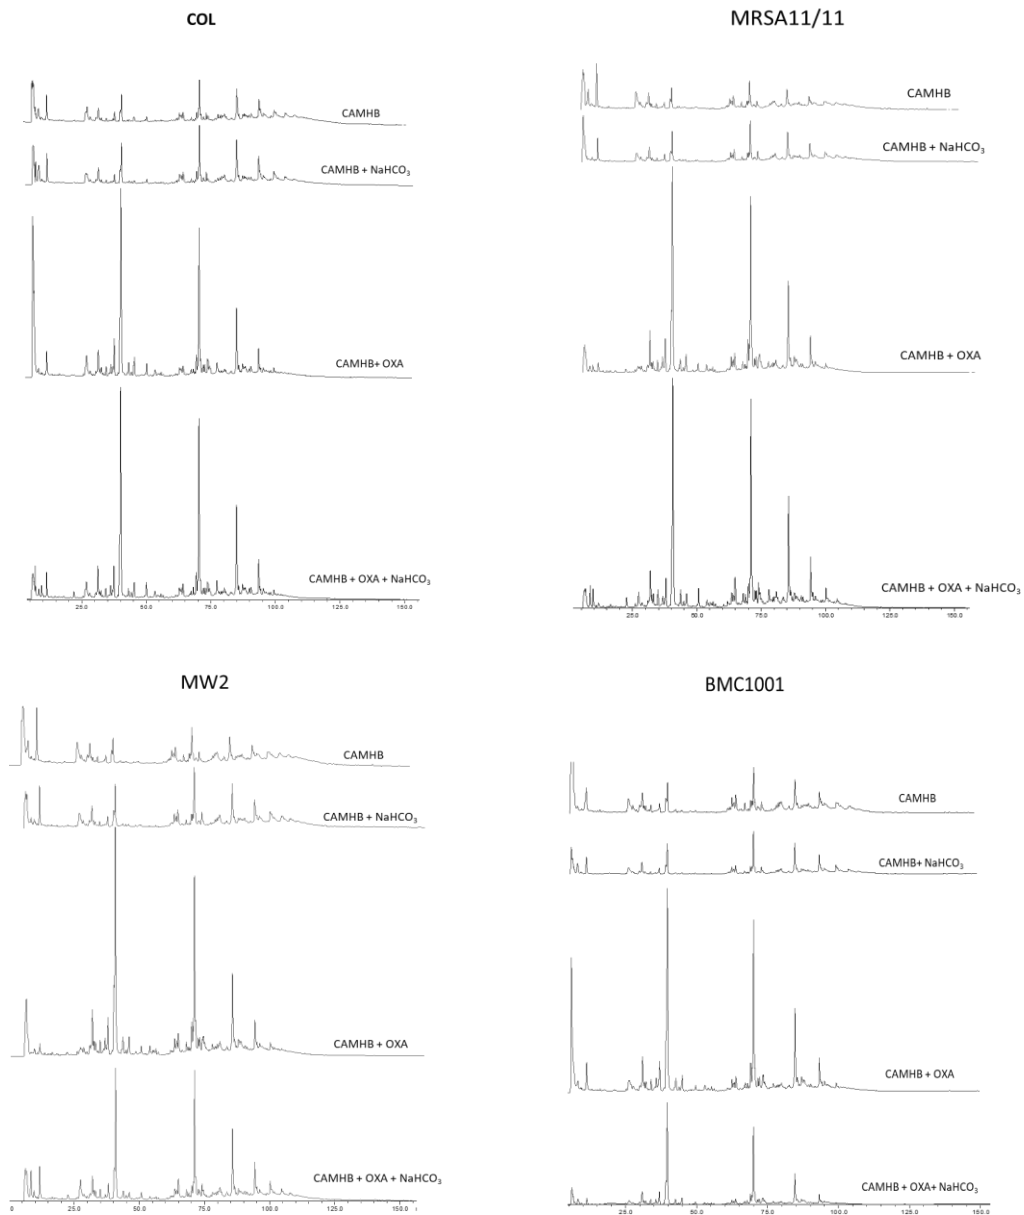

**Figure S2.** Peptidoglycan composition of *S. aureus* COL, BMC1001, MW2 and MRSA11/11 in CAMHB; CAMHB + 44 mM NaHCO<sub>3</sub>; CAMHB + 2% NaCl + <sup>1</sup>/<sub>2</sub>MIC oxacillin (128 µg/ml – COL; 64 µg/ml – BMC1001; 0.5 µg/ml – MW2 and MRSA11/11); CAMHB + 2% NaCl + <sup>1</sup>/<sub>2</sub>MIC oxacillin + 44 mM NaHCO<sub>3</sub> (128 µg/ml – COL; 64 µg/ml – BMC1001; 0.5 µg/ml – MW2 and MRSA11/11).

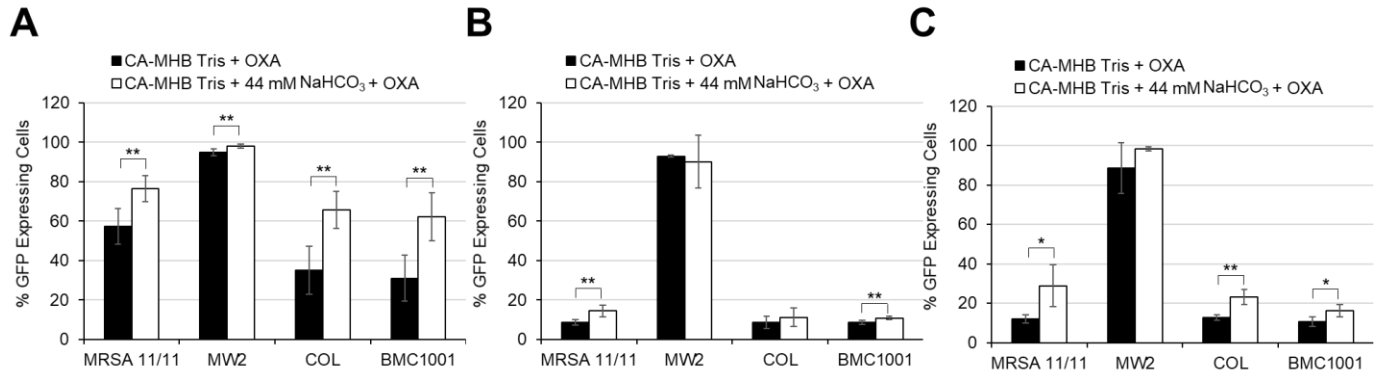

**Figure S3.** Flow cytometry to detect GFP expression in *tarO*, *tarG* and *dltA* translational fusions grown in the presence and absence of NaHCO<sub>3</sub>, as measured by % cells expressing GFP in population of 10,000 cells. (A) *tarO*, (B) *tarG*, (C) *dltA*. Flow readings were taken after 6 h of incubation in the indicated condition. OXA exposures are equivalent to 1/2X the MIC in the indicated condition (MRSA 11/11: 16 µg/mL CA-MHB Tris, 0.25 µg/mL CA-MHB Tris + 44 mM NaHCO<sub>3</sub>; MW2: 32 µg/mL CA-MHB Tris, 1 µg/mL CA-MHB Tris + 44 mM NaHCO<sub>3</sub>; COL: 256 µg/mL both conditions; BMC1001: 128 µg/mL both conditions). Statistics calculated by a Student's *t*-test, \*P < 0.05, \*\*P < 0.01.

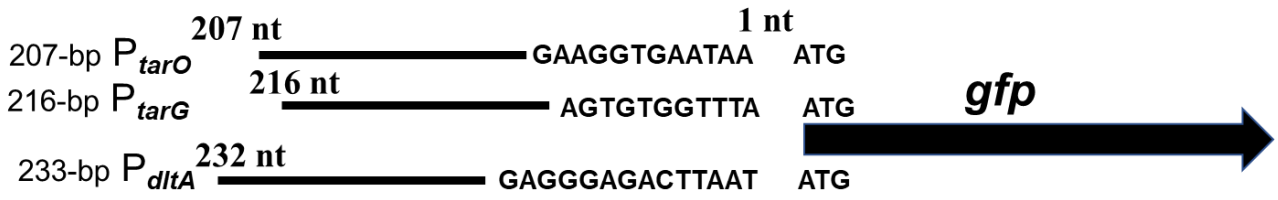

**Figure S4.** Schematic of translational constructs for *tarO*, *tarG*, and *dltA*. Numbers as indicated are marked based on the translation start codon of the respective genes.

**Table S1.** Acetic acid released (mg/L) by alkaline treatment of peptidoglycan of *S. aureus* strains COL, BMC1001, MW2 and MRSA11/11.

| <i>S. aureus</i> strains | CAMHB | CAMHB + 44 mM NaHCO <sub>3</sub> | CAMHB + 2% NaCl + Oxacillin | CAMHB + 2% NaCl + Oxacillin + 44 mM NaHCO <sub>3</sub> |
|--------------------------|-------|----------------------------------|-----------------------------|--------------------------------------------------------|
| COL                      | 138.2 | 156.6                            | 248.8                       | 219.1                                                  |
| BMC1001                  | 123.8 | 144.8                            | 195.7                       | 254.1                                                  |
| MW2                      | 123.5 | 140.5                            | 206.4                       | 262.5                                                  |
| MRSA11/11                | 132.9 | 168.6                            | 335.9                       | 280.0                                                  |

**Table S2.** Oxacillin minimum inhibitory concentrations (MICs, mg/L). In experiments in which sub-MIC concentrations of oxacillin were used, cells were exposed to 1/2 of the concentrations indicated in this table for each strain/condition.

| Strain     | CA-MHB | Ca-MHB 100 mM Tris | Ca-MHB 100 mM Tris 44 mM NaHCO <sub>3</sub> |
|------------|--------|--------------------|---------------------------------------------|
| MRSA 11/11 | 16     | 32                 | 0.5                                         |
| MW2        | 16     | 64                 | 2                                           |
| COL        | 256    | 512                | 512                                         |
| BMC1001    | 128    | 256                | 256                                         |

**Table S3.** qRT-PCR primers

| Gene        | Primer | Sequence (5' to 3')      |
|-------------|--------|--------------------------|
| <i>tarO</i> | Fwd    | ACGTACTTGGGCTTGTAGATGA   |
|             | Rev    | AGCAACTACTAAGGCAGCGG     |
| <i>tarG</i> | Fwd    | GGTGTGGCTTGGGAATTAAT     |
|             | Rev    | CTTGGTTGATGAAGAACCAC     |
| <i>dltA</i> | Fwd    | GGCTTAACCAAGCGCCATTT     |
|             | Rev    | TCGGTGTTGCTGTTAGCATT     |
| <i>fntA</i> | Fwd    | TCATCGATTACAGACGAAGACACA |
|             | Rev    | AGTTTAGACGGCGCAACCTT     |
| <i>gyrB</i> | Fwd    | CGCAGGCGATTTTACCATTA     |
|             | Rev    | GCTTTCGCTAGATCAAAGTCG    |

**Table S4.** Primers used for construction of *tarO*, *tarG*, and *dltA gfp* translational fusions.

| Primer Name       | Sequences (5' to 3')                                     |
|-------------------|----------------------------------------------------------|
| <i>tarO</i> rbs F | AGGAGAATCTAGAGAAGGTGAATAAATGATTAAGGAGAAGAAGAACTTTTC ACT  |
| <i>tarG</i> rbs F | AGGAGAATCTAGAAGTGTGGTTTAATGGAATGATTAAGGAGAAGAA CTTTTCACT |
| <i>dltA</i> rbs F | AGGAGAATCTAGAGAGGGAGACTTAATATGATTAAGGAGAAGAAGAACTTTTCCT  |
| 1484 <i>EcoRI</i> | GGA TCC CCG GGT ACC GAG CTC                              |
| <i>tarO EcoRI</i> | AAG GAG GAA TTC GCC TTA AAT GAT ATG ATG AAA AAA TGA      |
| <i>tarO XbaI</i>  | AGGA GAA TCT AGA ATC GAT ATT AAT TGT TTT TAA CGT TAT A   |
| <i>tarG EcoRI</i> | AAG GAG GAA TTC TGT TAA TCA TCA ATG ATA ACA ATG ATA      |
| <i>tarG XbaI</i>  | AGGA GAA TCT AGA TCA AAT GTT TAA CTA TTT CTC TAC TTA     |
| <i>dltA EcoRI</i> | AAG GAG GAA TTC AAC GTA TTT TAT ATT GAA CGG TCT TTA      |
| <i>dltA XbaI</i>  | AGGA GAA TCT AGA CTC ATT AGA ACT CAT TAT AAA TGA AGT TA  |

**Table S5.** Translational fusion strains generated for this study.

| Strain Number | Descriptions                                                                                                                |
|---------------|-----------------------------------------------------------------------------------------------------------------------------|
| ALC9423       | MW2 (pALC1484 with 207-bp <i>tarO</i> promoter region with <i>tarO</i> ribosome binding site before <i>gfp</i> gene)        |
| ALC9424       | BMC1001 (pALC1484 with 207-bp <i>tarO</i> promoter region with <i>tarO</i> ribosome binding site before <i>gfp</i> gene)    |
| ALC9425       | MRSA11/11 (pALC1484 with 207-bp <i>tarO</i> promoter region with <i>tarO</i> ribosome binding site before <i>gfp</i> gene)  |
| ALC9426       | COL (pALC1484 with 207-bp <i>tarO</i> promoter region with <i>tarO</i> ribosome binding site before <i>gfp</i> gene)        |
| ALC9427       | MW2 (pALC1484 with 216-bp <i>tarG</i> promoter region with <i>tarO</i> ribosome binding site before <i>gfp</i> gene)        |
| ALC9428       | BMC1001 (pALC1484 with 216-bp <i>tarG</i> promoter region with <i>tarO</i> ribosome binding site before <i>gfp</i> gene)    |
| ALC9429       | MRSA 11/11 (pALC1484 with 216-bp <i>tarG</i> promoter region with <i>tarO</i> ribosome binding site before <i>gfp</i> gene) |
| ALC9430       | COL (pALC1484 with 216-bp <i>tarG</i> promoter region with <i>tarO</i> ribosome binding site before <i>gfp</i> gene)        |
| ALC9431       | MW2 (pALC1484 with 232-bp <i>dltA</i> promoter region with <i>tarO</i> ribosome binding site before <i>gfp</i> gene)        |
| ALC9432       | BMC1001 (pALC1484 with 232-bp <i>dltA</i> promoter region with <i>tarO</i> ribosome binding site before <i>gfp</i> gene)    |
| ALC9433       | MRSA 11/11 (pALC1484 with 232-bp <i>dltA</i> promoter region with <i>tarO</i> ribosome binding site before <i>gfp</i> gene) |
| ALC9434       | COL (pALC1484 with 232-bp <i>dltA</i> promoter region with <i>tarO</i> ribosome binding site before <i>gfp</i> gene)        |

## Supplemental Methods

*Isolation of peptidoglycan for O-acetylation determination (1).* *S. aureus* COL, BMC1001, MRSA11/11 and MW2 were grown overnight in CA-MHB with and without NaHCO<sub>3</sub>. These cultures were used to inoculate CA-MHB with and without NaHCO<sub>3</sub>, and CA-MHB + 2% NaCl with <sup>1</sup>/<sub>2</sub>MIC of oxacillin with and without NaHCO<sub>3</sub> to an initial OD= 0.0006. At OD=0.3 the cells were harvested by centrifugation, washed twice with 100 ml of cold 0.9% NaCl, resuspended in 20 ml of 0.9% NaCl and boiled in water for 20 min. After chilling on ice, the cells were centrifuged, washed twice with 40 ml of 0.9% NaCl, and resuspended in 2 ml of 0.9% NaCl. The cells were disrupted in a mechanical grinding device using glass beads, centrifuged, washed twice with 2 ml of cold dd-water, and boiled for 30 min in 10 ml of 2% SDS to remove non-covalently bound proteins. After centrifugation, the cell wall fragments were suspended in 2 ml of 0.1 M Tris-HCl (pH 6.8) and incubated with 0.5 mg/mL trypsin for 16 h at 37°C with shaking to degrade cell-bound proteins. After centrifugation and washing with water, the cell walls were incubated for 5 h with 10% TCA to remove the teichoic acids. Purified peptidoglycan was isolated by centrifugation, washed four times with dd-water and lyophilized. To hydrolyze the O-acetyl groups, peptidoglycan (50 mg in 1.5 ml) was incubated for 3 h with 80 mM NaOH at 30°C with shaking. As a negative control, peptidoglycan was incubated for 3 h with 80 mM PBS (pH 6.4). The samples were centrifuged, and the released acetic acid was quantified by high-performance liquid chromatography (HPLC) on an organic acid column (HPX-87H; Bio-Rad) under the same conditions as the acetic acid standard (Bio-Rad) according to the instructions of the suppliers. Detection was performed at 205<sub>nm</sub>. The samples were injected into the column and eluted with 0.008 M sulphuric acid at a flow rate of 0.6 ml.min<sup>-1</sup> at 35°C.

*Peptidoglycan purification.* Cell wall isolation was performed as described previously (2, 3). *S. aureus* COL, BMC1001, MRSA11/11 and MW2 were grown overnight in CA-MHB with and without NaHCO<sub>3</sub>. These cultures were used to inoculate CA-MHB with and without NaHCO<sub>3</sub> and

CA-MHB + 2% NaCl with  $1/2$ MIC of oxacillin with and without antibiotic to an initial  $OD_{620}= 0.0006$ . At an  $OD_{620}=0.3$ , the cells were harvested by centrifugation, rapidly chilled in an ice-ethanol bath, and boiled in 4% SDS for 30 min. The cells were disrupted using 106-mm glass beads (**Sigma-Aldrich**) and subsequently treated with DNase (10  $\mu$ g/ml; **Sigma-Aldrich**), RNase (50  $\mu$ g/ml; **Sigma-Aldrich**), and trypsin (200  $\mu$ g/ml; **Worthington Biochemical Corporation**, USA). Teichoic acids were removed by treatment with 49% hydrofluoric acid (**Merck**, Germany) for 48 h at 4°C. The peptidoglycan was lyophilized.

*Muropeptide analysis by RP-HPLC.* Identical amounts of peptidoglycan of each sample were digested with mutanolysin (1 mg/ml; Sigma-Aldrich). This process was repeated in triplicate for each condition. The resulting muropeptides were reduced with sodium borohydride powder (**Sigma-Aldrich**) and separated by reverse-phase HPLC (RP-HPLC) using a Hypersil octyldecyl silane (**Runcorn**, Cheshire, UK) column and a linear gradient from 5% to 30% methanol in 100 mM sodium phosphate buffer, pH 2.5, at a flow rate of 0.5 ml/min as described previously (2, 3), using a Shimadzu Prominence system and Shimadzu LC solution software. The peaks of the chromatograms were identified by assessing the relative retention times according to previous studies (2, 3).

## REFERENCES

1. Bera A, Herbert S, Jakob A, Vollmer W, Götz F. 2005. Why are pathogenic staphylococci so lysozyme resistant? The peptidoglycan O-acetyltransferase OatA is the major determinant for lysozyme resistance of *Staphylococcus aureus*. *Mol Microbiol* 55:778-787.
2. De Jonge B, Chang Y-S, Gage D, Tomasz A. 1992. Peptidoglycan composition of a highly methicillin-resistant *Staphylococcus aureus* strain. The role of penicillin binding protein 2A. *J Biol Chem* 267:11248-11254.
3. De Jonge B, Chang Y-S, Gage D, Tomasz A. 1992. Peptidoglycan composition in heterogeneous Tn551 mutants of a methicillin-resistant *Staphylococcus aureus* strain. *J Biol Chem* 267:11255-11259.
